# Supplementary material
Source: Springer Nature journal article supplement (https://www.springermedizin.de/resource/supplementary/12967_2014_1869_MOESM2_ESM.pdf/9574962)
Supplement: MOESM2 [file 9574962]

**Table 2. Functionalized carbon nanotubes and graphene on Monocytes**

| Material                                                                            | Funzionalizations                                                      | Species                                                                             | Model                    | Other cell types | Year | Reference                               |
|-------------------------------------------------------------------------------------|------------------------------------------------------------------------|-------------------------------------------------------------------------------------|--------------------------|------------------|------|-----------------------------------------|
|    | Oxidized                                                               |    | Ex vivo                  |                  | 2012 | Meunier E et al. (Nanomedicine)         |
|    | PEGylated and coniugate with CpG                                       |    | Ex vivo                  |                  | 2011 | Zhao D et al. (Clin Cancer Res.)        |
|    | Oxidized, amidized conjuged with FITC                                  |    | Ex vivo                  | PBMCs            | 2012 | Delogu LG et al. (Nanomedicine (Lond).) |
|  | Carboxylated                                                           |  | In vivo, in vitro (THP1) | Macrophages      | 2011 | Wang X et al. (ACS Nano)                |
|  | FITC                                                                   |  | In vitro (THP1)          |                  | 2012 | Gul-Uludag H et al. (Biotechnol. Let.)  |
|  | Oxidized and functionalized with ammonium group and FITC               |  | In vitro (THP1)          | L. T             | 2013 | Pescatori M et al. (Biomaterials)       |
|  | Carboxylated, PEGylated, aminated, sidewall aminated, and PEI-modified |  | In vivo, in vitro (THP1) | Macrophages      | 2013 | Li R et al. (ACS Nano)                  |

| Legend                                                                            |                                                             |
|-----------------------------------------------------------------------------------|-------------------------------------------------------------|
|  | MWCNTs                                                      |
|  | DWCNTs                                                      |
|  | SWCNTs                                                      |
|  | Carbon Nanohorns                                            |
|  | Graphene                                                    |
|  | Graphene Oxide                                              |
|  | Mouse                                                       |
|  | Human                                                       |
| <i>Italics</i>                                                                    | <i>Articles that considered more than one type of cells</i> |
